# Supplementary material
Source: publisher site journal article supplement (https://www.dovepress.com/article/335879)
Supplement: Supplementary file 1 [file get_supplementary_file.php]

**Supplement**

| **Supplementary figure legends** | p. 2 |
| --- | --- |
| Supplementary Figure S1. Comparisons of overall survival between patients initially treated with TARE and TACE | p. 2 |
| Supplementary Figure S2. Comparisons of progression-free survival between patients initially treated with TARE and TACE | p. 4 |
| Supplementary Figure S3. Comparisons of intrahepatic progression-free survival between patients initially treated with TARE and TACE | p. 6 |
| Supplementary Table S1. Follow-up imaging modalities in both groups | p. 8 |
| Supplementary Table S2. Adjuvant or following treatments after TARE or TACE | p. 9 |
| Supplementary Table S3. Adverse events (toxicity) | p. 10 |

**Supplementary figure legends**

| 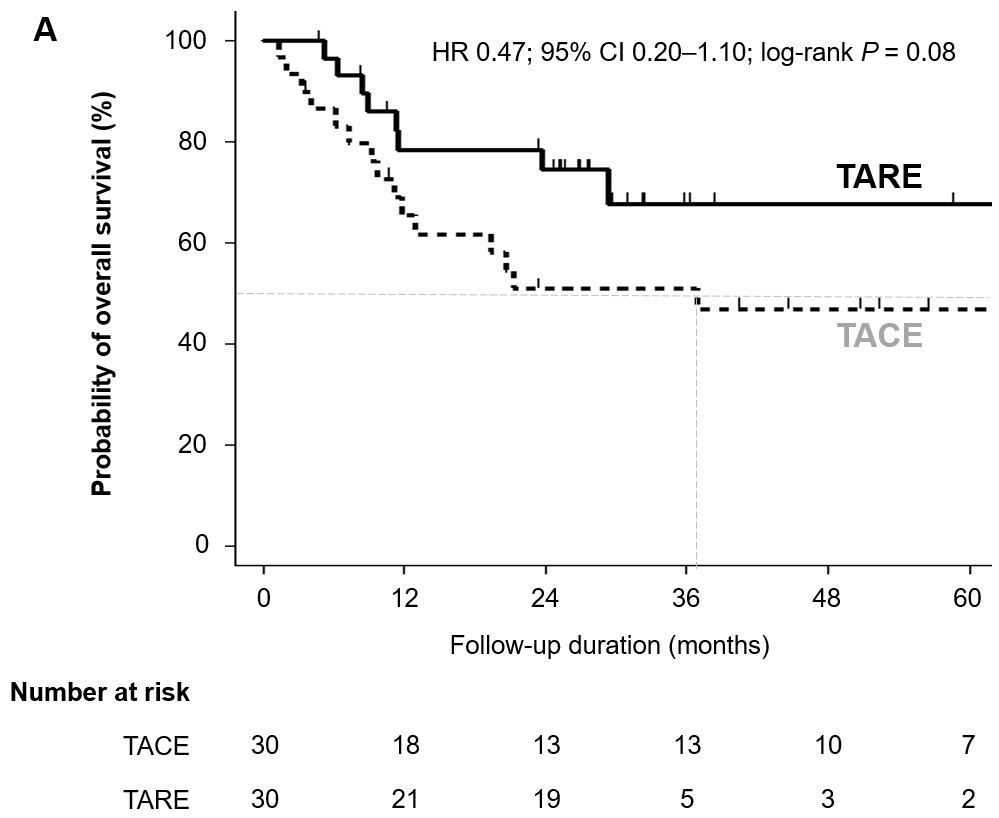 |
| --- |
| 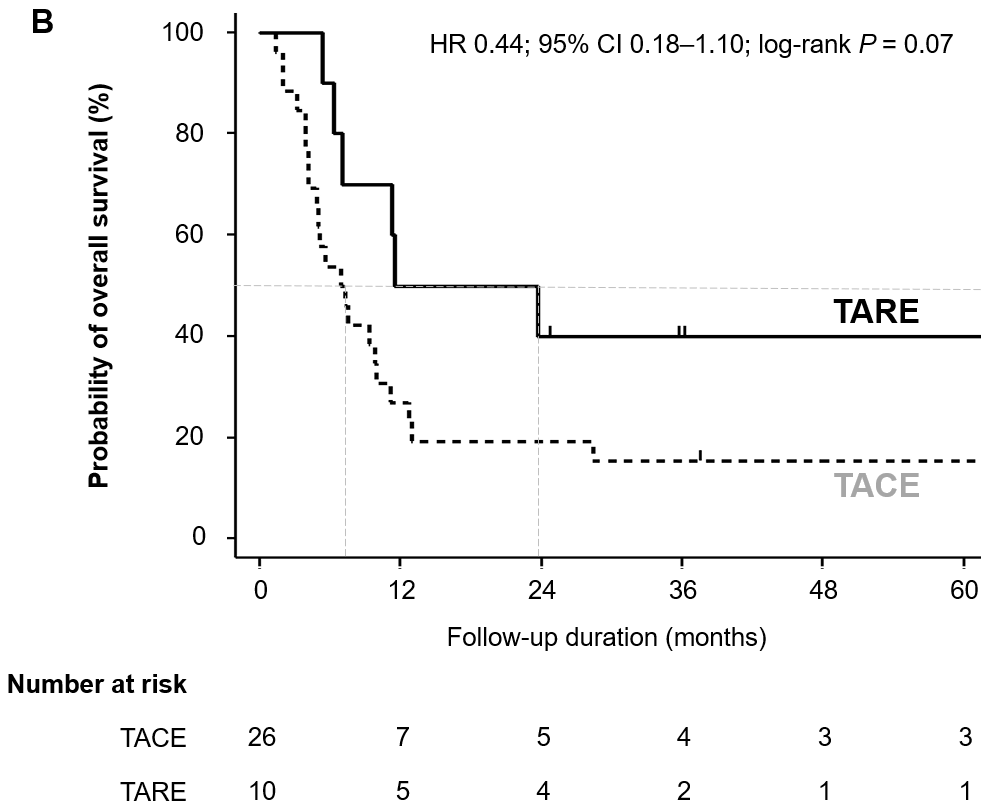 |
| 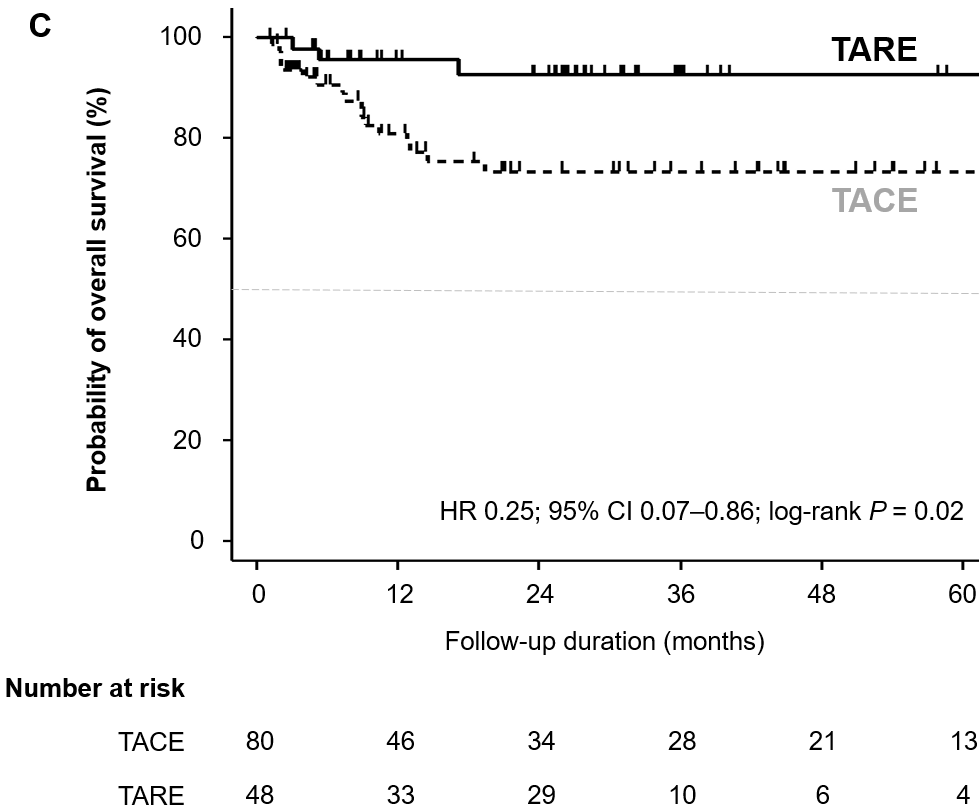 |
| **Supplementary Figure S1**. Comparisons of OS between patients initially treated with TARE and TACE in (**A**) patients with single HCC (*n*=60), (**B**) patients diagnosed with HCC with Vp3 or Vp4 PVTT (*n*=36), and (**C**) patients who did not be treated systemic treatment during follow-up.  **Abbreviations**: BCLC, Barcelona Clinic Liver Cancer; OS, overall survival; PVTT, portal vein tumor thrombosis; TACE, conventional trans-arterial chemoembolization; TARE, trans-arterial radioembolization. |

| 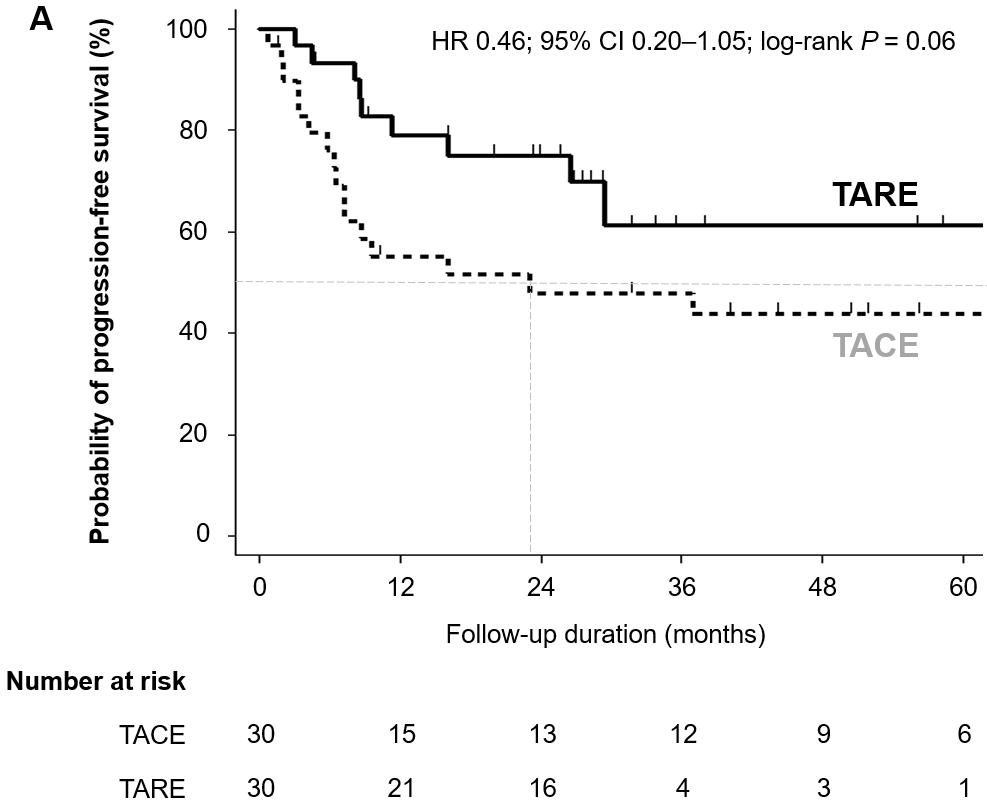 |
| --- |
| 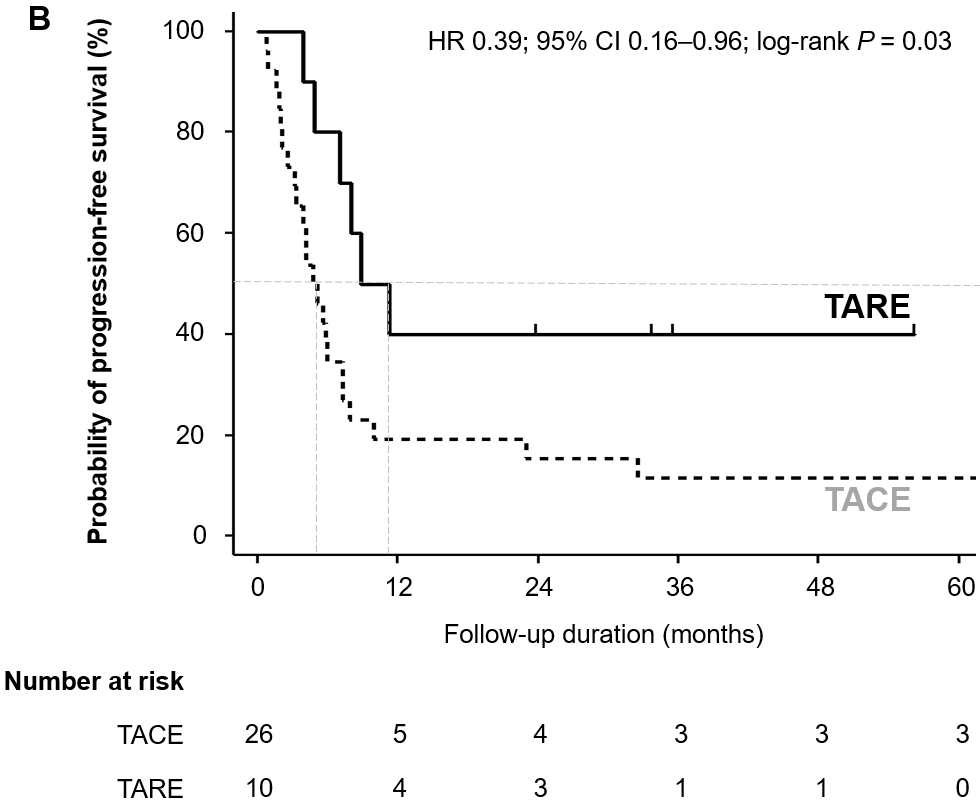 |
| 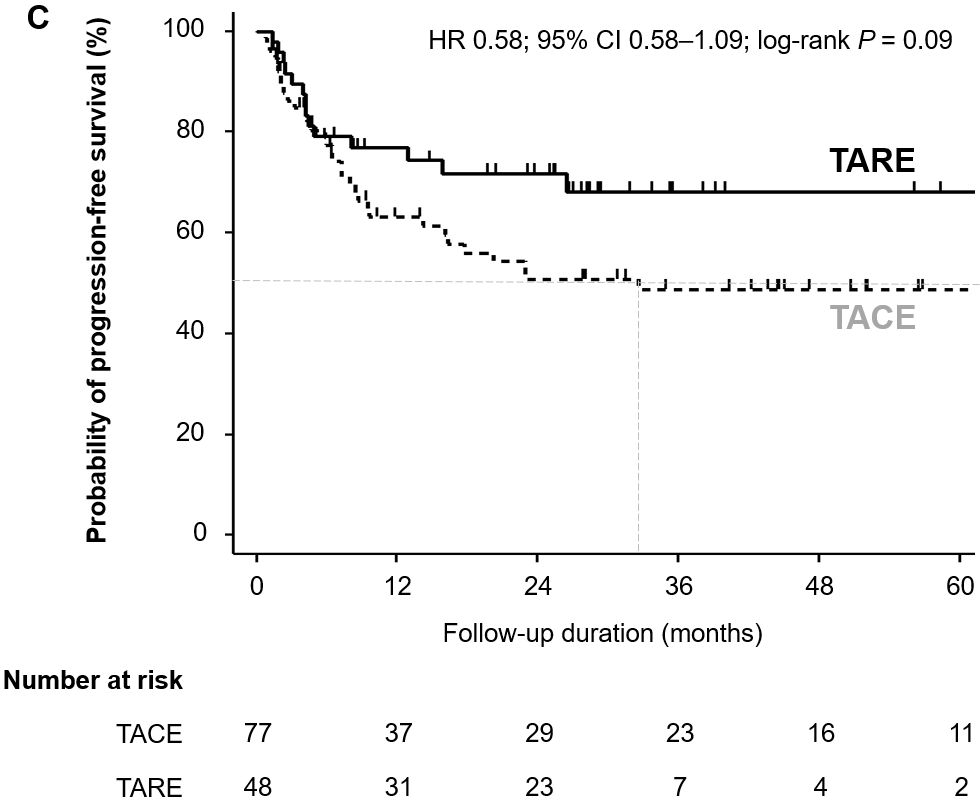 |
| **Supplementary Figure S2**. Comparisons of PFS between patients initially treated with TARE and TACE in (**A**) patients with single HCC (*n*=60), (**B**) patients diagnosed with HCC with Vp3 or Vp4 PVTT (*n*=36), and (**C**) patients who did not be treated systemic treatment during follow-up.  **Abbreviation**: BCLC, Barcelona Clinic Liver Cancer; PFS, progression-free survival; PVTT, portal vein tumor thrombosis; TACE, conventional trans-arterial chemoembolization; TARE, trans-arterial radioembolization. |

| 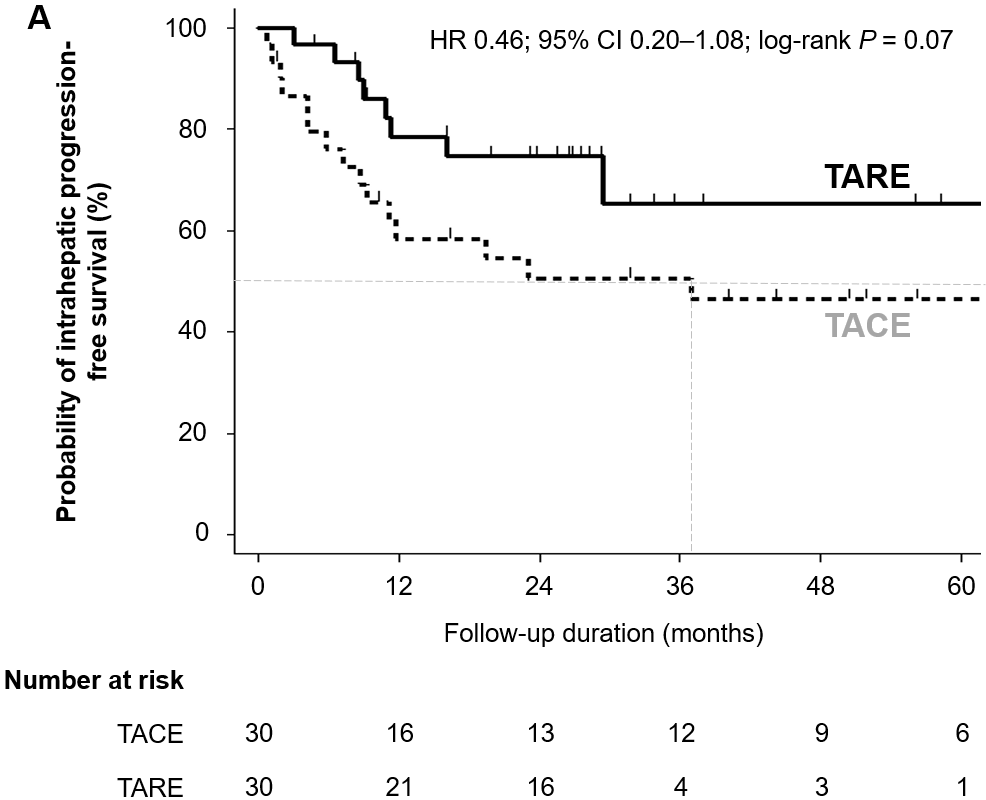 |
| --- |
| 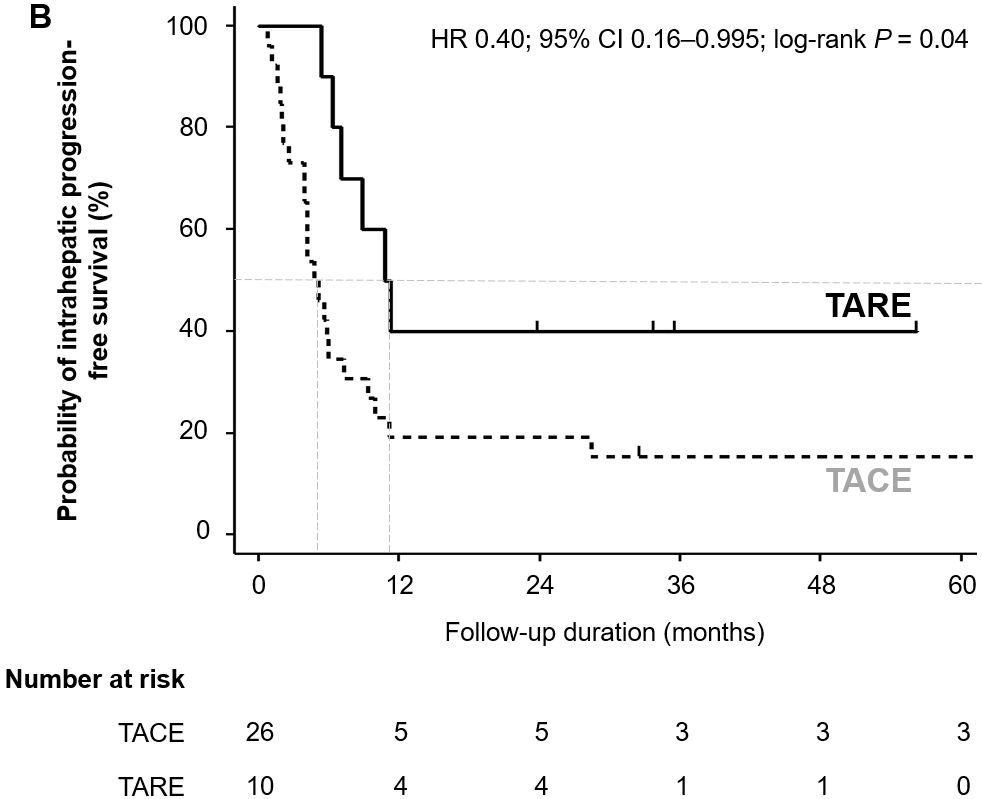 |
| 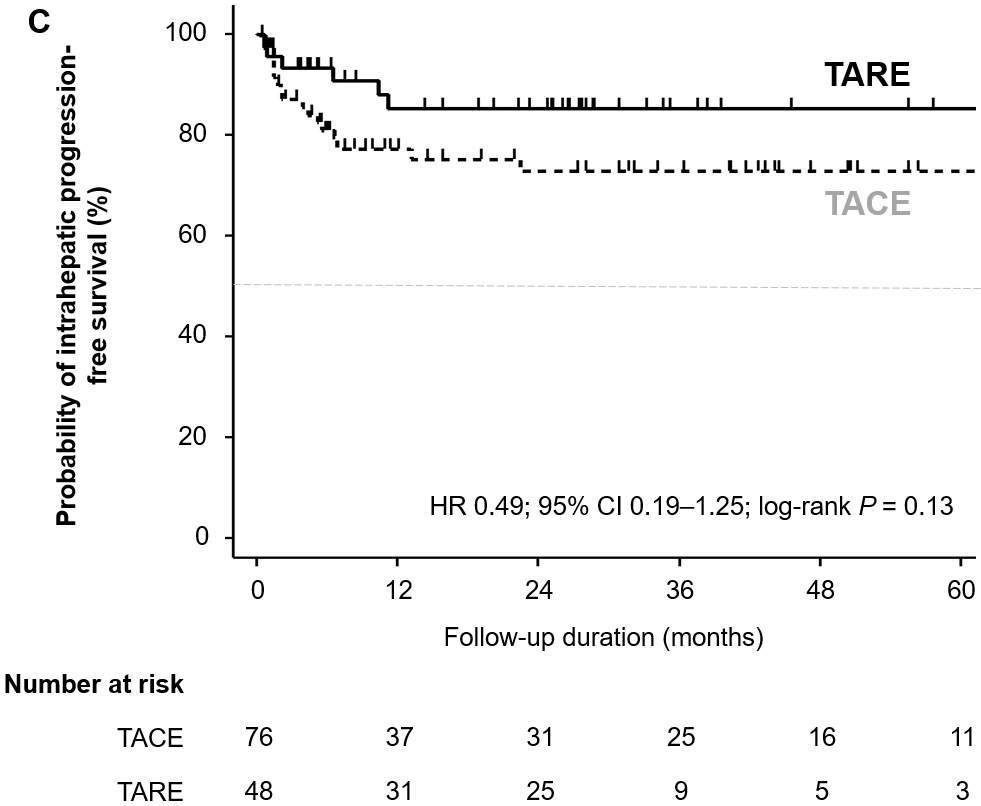 |
| **Supplementary Figure S3**. Comparisons of intrahepatic PFS between patients initially treated with TARE and TACE in (**A**) patients with single HCC (*n*=60), (**B**) patients diagnosed with HCC with Vp3 or Vp4 PVTT (*n*=36), and (**C**) patients who did not be treated systemic treatment during follow-up.  **Abbreviation**: BCLC, Barcelona Clinic Liver Cancer; PFS, progression-free survival; PVTT, portal vein tumor thrombosis; TACE, conventional trans-arterial chemoembolization; TARE, trans-arterial radioembolization. |

**Supplementary tables**

**Supplementary Table S1. Follow-up imaging modalities in both groups.**

|  | TARE (n = 54) | TACE (n = 84)* | *P* value |
| --- | --- | --- | --- |
| CT | 50 (92.6%) | 73 (91.2%) | 0.79 |
| MRI | 3 (5.6%) | 6 (7.5%) |  |
| Both | 1 (1.8%) | 1 (1.2%) |  |

*Four patients followed up without contrast imaging due to worse clinical courses after the treatment.

**Supplementary Table S2. Adjuvant or following treatments after TARE or TACE**

|  | TARE (n = 54) | TACE (n = 84) | *P* value |
| --- | --- | --- | --- |
| Adjuvant or following treatment, n (%)* | 39 (72.2%) | 71 (84.5%) | 0.08 |
| None | 15 (27.8%) | 13 (15.5%) |  |
| TARE | 2 (3.7%) | 0 (0.0%) |  |
| TACE | 28 (51.9%) | 56 (66.7%) |  |
| RFA | 3 (5.6%) | 5 (6.0%) |  |
| Resection or LT | 5 (9.3%) | 10 (11.9%) |  |
| EBRT | 1 (1.8%) | 0 (0.0%) |  |

* Treatments were performed for remnant or recurred tumors.

**Abbreviations**: EBRT, external beam radiation therapy; LT, liver transplantation; RFA, radiofrequency ablation; TACE, conventional trans-arterial chemoembolization; TARE, trans-arterial radioembolization.

**Supplementary Table S3. Adverse events (toxicity)**

|  | TARE (n = 54) | TACE (n = 84) | *P* value |
| --- | --- | --- | --- |
| Clinical toxicity (grade 1 or 2), n (%) |  |  | < 0.001 |
| Fatigue | 0 (0.0%) | 4 (4.8%) |  |
| Abdominal pain | 9 (16.7%) | 45 (53.6%) |  |
| Fever/Chill | 4 (7.4%) | 51 (60.7%) |  |
| Nausea/Vomiting | 3 (5.6%) | 19 (22.6%) |  |
| Anorexia | 0 (0.0%) | 15 (17.9%) |  |
| Diarrhea | 0 (0.0%) | 1 (1.2%) |  |
| Clinical toxicity (grade 3 or 4), n (%) |  |  | 0.24 |
| Gastrointestinal hemorrhage | 0 (0.0%) | 2 (2.4%) |  |
| Pleural effusion or dyspnea | 0 (0.0%) | 0 (0.0%) |  |
| Unbearable pain or fever | 1 (1.8%) | 0 (0.0%) |  |
| Ascites exacerbation | 0 (0.0%) | 3 (3.6%) |  |
| Hepatic failure | 0 (0.0%) | 2 (2.4%) |  |
| Atrial fibrillation | 0 (0.0%) | 0 (0.0%) |  |
| Hepatic encephalopathy | 0 (0.0%) | 0 (0.0%) |  |
| Sepsis  Infection/Bacteremia | 0 (0.0%)  0 (0.0%) | 2 (2.4%)  3 (3.6%) |  |
| Laboratory toxicity (grade 3 or 4), n (%)* |  |  | 0.08 |
| Elevated transaminase | 0 (0.0%) | 3 (4.2%) |  |
| Hyperbilirubinemia | 0 (0.0%) | 6 (8.4%) |  |
| Serum creatinine elevation | 0 (0.0%) | 0 (0.0%) |  |
| MELD score > 10* | 4 (7.8%) | 17 (23.9%) | 0.02 |

* Data during 3–6 months after TARE or TACE was used (16 missings).
